# Supplementary material for: Layer charge robust delamination of organo-clays
Source: Royal Society of Chemistry journal article supplement (doi:10.1039/c8ra05318a), 2018-01-01
Supplement: c8ra05318a1.pdf [file c8ra05318a1.pdf]

# Layer Charge Robust Delamination of Organo-Clays

Matthias Daab,<sup>a</sup> Natalie J. Eichstaedt,<sup>a</sup> Andreas Edenharter,<sup>a</sup> Sabine Rosenfeldt<sup>a</sup> and Josef Breu<sup>a\*</sup>

<sup>a</sup>Bavarian Polymerinstitute and Department of Chemistry, University of Bayreuth, D-95440 Bayreuth, Germany

## Supporting Information

### Content:

1. Supporting Data
  - PXRD of Clay Minerals
  - Layer Charge Determination: Charge Density vs. Chain Length
  - Meglumine-clays: CHN and EDX
  - Volume Fraction of Gels (Calculation).
  - Glucosamine-clays
  - Hec<sub>pri</sub>: birefringence
2. Supporting References

# 1. Supporting Data

## PXRD of Clay Minerals.

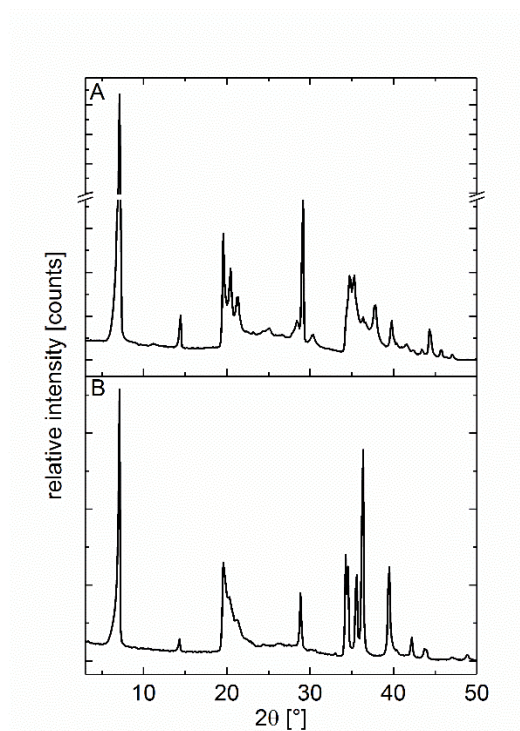

**Fig. S1:** PXRDs of Hec (A) and Verm (B) indicate a crystalline swollen phase with one layer of water molecules in the interlayer space ( $d_{001} = 12.5 \text{ \AA}$ ). The patterns can be indexed in C2/m (No. 12) and least square refined lattice parameters for Hec ( $a = 5.20(1) \text{ \AA}$ ,  $b = 9.10(1) \text{ \AA}$ ,  $c = 12.48(4) \text{ \AA}$ ,  $\gamma = 95.44(4)^\circ$ ) and Verm ( $a = 5.26(1) \text{ \AA}$ ,  $b = 9.07(2) \text{ \AA}$ ,  $c = 12.48(4) \text{ \AA}$ ,  $\gamma = 95.22(4)^\circ$ ) can be derived without unindexed lines.

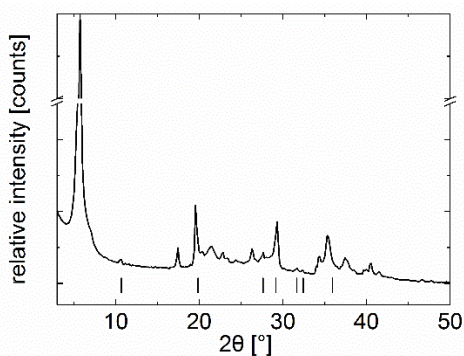

**Fig. S2:** PXRD of as synthesized Hec<sub>pri</sub>, Proto-amphibol (PDF2-database number 00-013-0409, the most intense reflexions are marked by ticks) is found as a sidephase.

## Layer Charge Determination.

**Tab. S1:** Layer charges corresponding to dense packings of mono- or bilayers for n-alkylammonium chains ( $C_nH_{2n+1}NH_3^+$ ) of different length n. The layer charge that results in a dense monolayer or a dense bilayer arrangement is given as follows, assuming a typical  $a,b$  area of  $47.6 \text{ \AA}^2$ :<sup>1</sup>

| chain length n | monolayer<br>[p.f.u.] | bilayer<br>[p.f.u.] |
|----------------|-----------------------|---------------------|
| 5              | 0.56                  | 1.12                |
| 6              | 0.50                  | 0.99                |
| 7              | 0.44                  | 0.89                |
| 8              | 0.40                  | 0.80                |
| 9              | 0.37                  | 0.73                |
| 10             | 0.34                  | 0.67                |
| 11             | 0.31                  | 0.62                |
| 12             | 0.29                  | 0.58                |
| 13             | 0.27                  | 0.54                |
| 14             | 0.25                  | 0.51                |
| 15             | 0.24                  | 0.48                |

## Meglumine-clays: CHN-analysis and EDX.

The completeness of exchange was determined by CHN- and by EDX-analysis for the remaining sodium-content. Interlayer cation content was calculated by carbon content. The amount of organo-cations per gram clay is calculated from the determined wt% of carbon in the organo-clay; the amount of carbon atoms per Meglumine-cation (7) and the molar mass of carbon:

$$CEC_{Meglum-clay} = \frac{wt\% C}{7 \cdot 12.011 g/mol}$$

$CEC_{Meglum-clay}$  was compared to the expected maximum Meglumine-content in mmol / 100 g ( $CEC_{Meglum-max.}$ ) as calculated from the amount of exchangeable  $Na^+$ -ions  $n$  per 100 g. The amount  $n$  is given in mval as determined by the  $BaCl_2$ -method,  $n_{Verm} = 185$  mval (per 100 g),  $n_{Hec} = 129$  mval (per 100 g),  $n_{LCR1} = 103$  mval (per 100 g),  $n_{LCR2} = 75$  mval (per 100 g) and  $n_{Hec-Pri} = 116$  mval (per 100 g). Furthermore, the molar masses  $M$  of the former interlayer ions of the clays and Meglumine-cations are needed.

$$CEC_{Meglum-max} = \frac{n}{100 g - M(\text{former interlayer ions}) \cdot n + M(\text{Meglumine}) \cdot n}$$

The completeness of organo-exchange is calculated from the ratio  $CEC_{Meglum-clay} / CEC_{Meglum-max}$  and is listed in Table S2.

**Tab. S2:** CHN-analysis of Meglumine-clays.

|                                    | Verm  | Hec    | LCR1  | LCR2  | Hec <sub>pri</sub> |
|------------------------------------|-------|--------|-------|-------|--------------------|
| wt% C                              | 8.769 | 11.580 | 7.598 | 5.809 | 7.470              |
| $CEC_{Meglum-clay}$<br>[mmol/100g] | 138   | 104    | 90    | 69    | 89                 |
| $CEC_{Meglum-max}$<br>[mmol/100g]  | 140   | 105    | 87    | 66    | 97                 |
| deviation                          | -2%   | -1%    | +4%   | +5%   | -8%                |

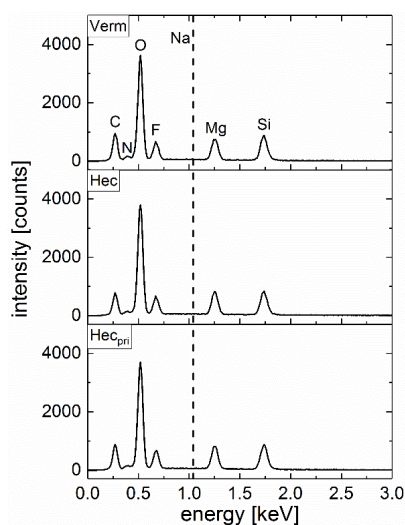

**Fig. S3.** The EDX-measurements of the Na-clays (Verm, Hec and Hec<sub>pri</sub>) do not show remaining Na (position of Na-K<sub>α</sub> shown by dashed line) in dried Meglumine-clay (separation of Na-containing side phases like Protoamphibole was carried out by sedimentation for the case of delaminated Hec<sub>pri</sub> prior to sample preparation).

## Volume Fraction of Gels.

First of all, the weight-fraction of the clay lamellae in the dry Meglumine-clay sample is calculated as follows:

$$wt\%_{lamellae} = 1 - wt\%_{Meglumine}$$

The weight fraction of Meglumine is determined by CHN-analysis.

The volume fraction  $\phi$  is calculated using the density of the lamellae ( $2.7 \text{ gcm}^{-3}$ ) and water ( $1.0 \text{ gcm}^{-3}$ ):

$$\phi = \frac{wt\%_{lamellae} \cdot m_{clay} / \rho_{lamellae}}{wt\%_{lamellae} \cdot m_{clay} / \rho_{lamellae} + m_{water} / \rho_{water}}$$

The expected d-spacing is calculated using the thickness ( $t = 9.6 \text{ \AA}$ ) of a clay lamella:

$$d = t / \phi$$

## Hec<sub>pri</sub>: Birefringence.

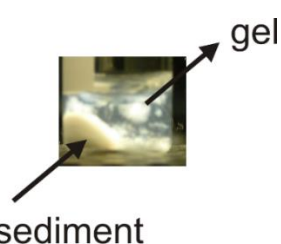

**Fig. S4.** Suspension of Hec<sub>Pri</sub> between crossed polarizers. The supernatant gel (containing < 5 wt% of the total solid content) forms a birefringent, lyotropic suspension between crossed polarizers.

## Glucosamine-clays.

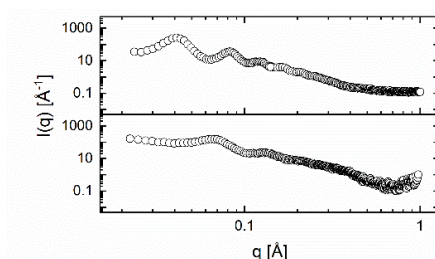

**Fig. S5.** SAXS-patterns of Glucosamine-clays: Verm (154 Å, 6.1 vol%, expected: 157 Å) and LCR2 (97 Å, 9.3 vol%, expected: 103 Å).

## 2. Supporting References

(1) Mermut, A. R.; Lagaly, G. Baseline Studies of the Clay Minerals Society Source Clays: Layer-charge Determination and Characteristics of those Minerals Containing 2:1 Layers. *Clays Clay Miner.* **2001**, *49*, 393-397.
